# Supplementary material for: A novel allylic transfer reaction of chirally modified 2-borylbutadiene: synthesis of chiral homoallenyl alcohols
Source: Royal Society of Chemistry journal article supplement (doi:10.1039/c0cc05751g), 2011-01-01

## Electronic Supplementary Information

### A novel allylic transfer reaction of chirally modified 2-borylbutadiene: synthesis of chiral homoallenyl alcohols

Jihoon Choi, Bobin Lee and Chan-Mo Yu\*

*BK-21 School of Chemical Materials Science and Department of Chemistry  
Sungkyunkwan University, Suwon 440-746, Korea*

**General.** All reactions were run in flame-dried glassware under an atmosphere of nitrogen or argon. Dichloromethane and 1,4-dioxane was distilled from CaH<sub>2</sub> prior to use. All liquid reagents purchased from the Aldrich or TCI were distilled properly prior to use, unless otherwise indicated. Purification was conducted by flash column chromatography on silica gel (230-400 mesh), eluting with a mixture of hexanes and ethyl acetate, unless otherwise stated. The reported yields refer to chromatographically purified and isolated products. All reactions were monitored by thin layer chromatography carried out on Merck silica gel plate (60 F<sub>254</sub>) using UV light as visualizing agent and ethanolic anisaldehyde solution and heat as developing agent. Silica gel 60 (TA792685, 230-400 mesh) from Merck was used for column chromatography. The reported yields are for chromatographically pure isolated products. FT-IR spectra were recorded on a Nicolet 320. <sup>1</sup>H NMR spectra were recorded on a Varian Unity Inova at 500 MHz or 300 MHz in CDCl<sub>3</sub> as a solvent with TMS or residual chloroform as the internal standard. <sup>13</sup>C NMR spectra were measured on a Varian Unity Inova at 75 or 125 MHz in CDCl<sub>3</sub> as a solvent. Mass spectra were recorded on a Varian Ion Trap 4000 GC/MS and Quattro micro API. Optical rotations were measured on a JASCO P-1020 digital polarimeter at ambient temperature. Enantiomeric excesses were determined by HPLC analysis using chiral column (Chiracel OD-H and OD-RH) and/or <sup>1</sup>H NMR analysis of the corresponding (+)-MTPA esters in comparison with sample obtained from (*1R,2R*)-**3a**.

**(1*S*,2*S*)-1,2-*N,N'*-Bis[(4-toluenesulfonyl)amino]-cyclohexane (**3c**):**

A mixture of (1*S*,2*S*)-cyclohexane-1,2-diamine (1.2 g, 10.5 mmol), DMAP (90 mg, 1.04 mmol), and CH<sub>2</sub>Cl<sub>2</sub> (30 mL) was placed in flame-dried flask. The solution was cooled to 0 °C and triethylamine (4.4 mL, 3.19 g, 31.5 mmol) was added. After then, *p*-toluenesulfonyl chloride (4.6 g, 24.2 mmol) dissolved in CH<sub>2</sub>Cl<sub>2</sub> (10 mL) was transferred via cannular at 0 °C. The reaction was allowed to proceed for 3h, and then quenched by addition of aqueous buffer solution (pH 7, 10 mL). The aqueous layer was extracted with CH<sub>2</sub>Cl<sub>2</sub> (ca 30 mL x 2). The combined organic extracts were washed with 10% aqueous HCl, saturated NaHCO<sub>3</sub>, and brine and dried over MgSO<sub>4</sub>. After filtration, the residue was concentrated under reduced pressure to give the crude product as fairly pure form. Final purification was effected by SiO<sub>2</sub> chromatography (EtOAc: Hexanes = 1:1) to afford **3a** (3.68 g, 8.71 mmol, 83%); [ $\alpha$ ]<sub>D</sub><sup>25</sup> = -12.70 (c 1.2, CHCl<sub>3</sub>); FT-IR(film): 3281, 3059, 2941, 2861, 1598, 1305, 1259, 1161 cm<sup>-1</sup>; <sup>1</sup>H NMR (300MHz, CDCl<sub>3</sub>):  $\delta$  1.04-1.10 (m, 4H), 1.57-1.59 (m, 2H), 1.84-1.87 (m, 2H), 2.43 (s, 6H), 2.72 (m, 2H), 4.75 (s, 2H), 7.32 (d, *J* = 8.4 Hz, 4H), 7.75 (d, *J* = 8.1 Hz, 4H); <sup>13</sup>C NMR (75MHz, CDCl<sub>3</sub>):  $\delta$  21.7, 24.2, 33.2, 56.6, 127.3, 129.8, 137.1, 143.6.

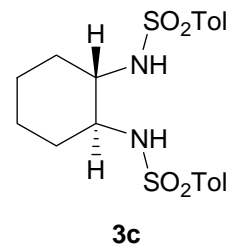

**Typical procedure for the synthesis of (-)-(S)-1-phenylhepta-5,6-dien-3-ol (**2a**):**

A flame-dried 20 ml Schlenk flask containing **3c** (200 mg, 0.45 mmol) was charged with dry CH<sub>2</sub>Cl<sub>2</sub> (7 mL). The resulting mixture was cooled to 0 °C and treated with BBr<sub>3</sub> (0.6 mL, 0.6 mmol, freshly prepared 1 M solution in CH<sub>2</sub>Cl<sub>2</sub>). The solution was stirred at 0 °C for 1 h, warmed to 23 °C and kept for additional 3 h. The resulting solution was concentrated under vacuum (1 mmHg) through a side neck of the flask connected with three hold-cork valve. Dryness of the vacuum line was maintained with a drying tube containing anhydrous CaSO<sub>4</sub> and two traps (NaOH pellets and cold trap at -78 °C). Freshly distilled toluene (3 mL) was added and evaporated under vacuum as above. Freshly distilled CH<sub>2</sub>Cl<sub>2</sub> (4 mL) was added and the homogeneous solution of bromoborane complex **4c** was cooled to 0 °C. After then, buta-2,3-dienyltributylstannane (**5**, 0.185 g, 0.52 mmol) in CH<sub>2</sub>Cl<sub>2</sub> (1 mL) was slowly added for 10 min. After 1h at 0 °C, this solution was allowed to warm to 25 °C (rt) and was stirred for the additional 3h. After cooling to -78 °C,

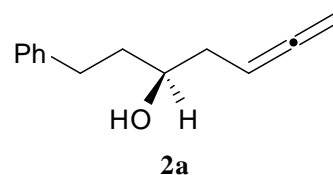

hydrocinnamaldehyde (purified and distilled, 67 mg, 0.50 mmol) in CH<sub>2</sub>Cl<sub>2</sub> (1 mL) was added over 10 min along the wall of the flask while keeping the temperature below –78 °C. The reaction was allowed to proceed for 2 h at –78 °C, and then quenched by addition of aqueous buffer solution (pH 7, 10 mL) followed by CH<sub>2</sub>Cl<sub>2</sub> (ca 10 mL) to dissolve white precipitate (bis-sulfonamide). The aqueous layer was extracted with CH<sub>2</sub>Cl<sub>2</sub> (ca 10 mL x 2). The combined organic extracts were washed with saturated NaHCO<sub>3</sub> (1x), brine (1x), dried over anhydrous Na<sub>2</sub>SO<sub>4</sub>, filtered, evaporated, and taken up ether (ca 30 mL). The solution was cooled to 0 °C for 20 min to complete precipitation of **3c**. After removal of **3c** by filtration through a sintered glass funnel, the filtrate was washed with cold 20 % KF (1x) and saturated aqueous NaHCO<sub>3</sub> (1x). The organic layer was separated, dried over anhydrous Na<sub>2</sub>SO<sub>4</sub>, filtered, and concentrated under reduced pressure to give the crude product. Final purification was effected by SiO<sub>2</sub> chromatography (Hexanes:EtOAc = 4:1) to afford **2a** (66 mg, 0.35 mmol, 78%) as a colorless oil. TLC, R<sub>f</sub> 0.37 (3:1 Hexanes/EtOAc); [α]<sub>D</sub><sup>23</sup> = –25.1 (c = 1.0 in CHCl<sub>3</sub>); FT-IR (film): 3386, 3061, 3025, 2925, 1955 cm<sup>–1</sup>; <sup>1</sup>H NMR (500MHz, CDCl<sub>3</sub>): δ 1.69 (d, *J* = 4.5 Hz, 1H), 1.78-1.85 (m, 2H), 2.11-2.20 (m, 1H), 2.21-2.29 (m, 1H), 2.69 (m, 1H), 2.82 (m, 1H), 3.68-3.76 (m, 1H), 4.71 (ddt, *J* = 7.0, 3.0, 1.0 Hz, 2H), 5.12 (tt, *J* = 7.0, 7.0 Hz, 1H), 7.19 (m, 3H), 7.29 (m, 2H); <sup>13</sup>C NMR (125MHz, CDCl<sub>3</sub>): δ 32.3, 36.9, 38.6, 70.7, 75.2, 86.3, 126.1, 128.6, 128.7, 142.3, 209.7; GC/MS (EI) *m/z* 188 (M<sup>+</sup>, 4), 134 (100), 107 (65).

Chiral HPLC analysis, Chiralcel OD-H. 1 mL/min, Hexanes/*i*-PrOH = 97:3, *t*<sub>R</sub> 14.1 min (major) : 19.4 min (minor), 91% *ee*

**(+)-(S)-Hexa-4,5-dien-2-ol (2b):**

Purified by SiO<sub>2</sub> column chromatography (pentane:ether = 3:2). TLC, R<sub>f</sub> 0.42 (3:1 Hexanes/EtOAc); [α]<sub>D</sub><sup>23</sup> = +8.8 (c = 1.0 in CHCl<sub>3</sub>); FT-IR (film): 3045, 2968, 2914, 2856, 1956, 1122, 844 cm<sup>–1</sup>; <sup>1</sup>H NMR (500MHz, CDCl<sub>3</sub>): δ 1.24 (d, *J* = 6.2 Hz, 3H), 1.8

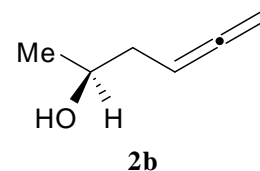

(bs, 1H), 2.10-2.24 (m, 2H), 3.90 (m, 1H), 4.72 (dt, *J* = 6.5, 3.0 Hz, 1H), 5.13 (tt, *J* = 7.0, 7.0 Hz, 1H); <sup>13</sup>C NMR (125MHz, CDCl<sub>3</sub>): δ 23.2, 36.7, 67.3, 75.0, 86.4, 209.7; MS (ESI) *m/z* 121 (M+Na<sup>+</sup>, 11), 83 (22), 82 (18), 44 (100).

Chiral HPLC analysis, Chiralcel OD-H. 0.8 mL/min, Hexanes: *i*-PrOH = 97:3, *t*<sub>R</sub> 20.1 min (minor) : 23.4 min (major), <sup>1</sup>H NMR analysis of (+)-MTPA ester: δ 1.33 (d, minor), 1.28 (d, major), 93% *ee*

**(+)-(S)-Undeca-1,2-dien-5-ol (2c):**

TLC,  $R_f$  0.47 (3:1 Hexanes/EtOAc);  $[\alpha]_D^{25} = +9.3$  ( $c = 1.2$  in  $\text{CHCl}_3$ ); FT-IR (film): 3365, 2928, 2857, 1956, 1018, 835  $\text{cm}^{-1}$ ;  $^1\text{H}$  NMR (500 MHz,  $\text{CDCl}_3$ ):  $\delta$  0.90 (t,  $J = 7.0$  Hz, 3H), 1.26-1.37 (m, 8H), 1.51 (m, 2H), 1.67 (d,  $J = 4.5$  Hz, 1H), 2.08-2.16 (m, 1H), 2.21-2.29 (m, 1H), 3.70 (m, 1H), 4.73 (dd,  $J = 7.0, 3.1$  Hz, 2H), 5.14 (tt,  $J = 7.0, 7.0$  Hz, 1H);  $^{13}\text{C}$  NMR (125 MHz  $\text{CDCl}_3$ ):  $\delta$  14.3, 22.8, 25.8, 29.5, 32.0, 36.7, 36.9, 71.4, 75.0, 86.5, 209.6; GC/MS (EI)  $m/z$  182 ( $\text{M}^+$ , 9), 121 (27), 129 (100), 83 (24).  
Chiral HPLC analysis, Chiralcel OD-H. 1 mL/min, Hexanes:*i*-PrOH = 98:2,  $t_R$  14.7 min (major) : 22.5 (minor), 93% *ee*

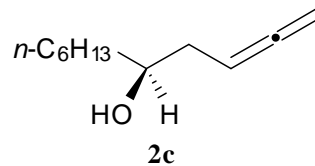

**(-)-(R)-1-phenylhexa-4,5-dien-2-ol (2d):**

TLC,  $R_f$  0.38 (3:1 Hexanes/EtOAc);  $[\alpha]_D^{25} = -6.35$  ( $c = 1.0$  in  $\text{CHCl}_3$ ); FT-IR (film): 3398, 3061, 3027, 2918, 1955,  $\text{cm}^{-1}$ ;  $^1\text{H}$  NMR (500 MHz,  $\text{CDCl}_3$ ):  $\delta$  1.75 (d,  $J = 4.0$  Hz, 1H), 2.15-2.31 (m, 2H), 2.72 (dd,  $J = 13.6, 7.9$  Hz, 1H), 2.86 (dd,  $J = 13.6, 4.9$  Hz, 1H), 3.93 (m, 1H), 4.73 (dt,  $J = 7.0, 3.0$  Hz, 2H), 5.17 (tt,  $J = 7.0, 7.0$  Hz, 1H), 7.24 (m, 3H), 7.31 (m, 2H);  $^{13}\text{C}$  NMR (125 MHz,  $\text{CDCl}_3$ ):  $\delta$  35.9, 43.4, 72.3, 75.2, 86.5, 126.7, 128.8, 129.7, 138.6, 209.7; GC/MS (EI)  $m/z$  174 ( $\text{M}^+$ , 3), 143 (32), 83 (100); Anal. Calcd for  $\text{C}_{12}\text{H}_{14}\text{O}$ : C, 82.72; H, 8.10; O, 9.18. Found: C, 82.61; H, 8.03.  
Chiral HPLC analysis, Chiralcel OD-H. 0.8 mL/min, Hexanes:*i*-PrOH = 97:3,  $t_R$  15.3 min (major) : 20.8 min (minor),  $^1\text{H}$  NMR analysis of (+)-MTPA ester:  $\delta$  5.11 (minor), 4.99 (major), 86% *ee*

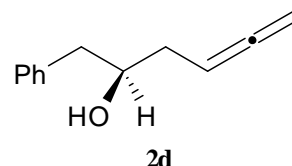

**(+)-(S)-2-methylocta-6,7-dien-4-ol (2e):**

TLC,  $R_f$  0.40 (3:1 Hexanes/EtOAc);  $[\alpha]_D^{22} = +10.3$  ( $c = 1.4$  in  $\text{CHCl}_3$ ); FT-IR (film): 3358, 2956, 2870, 1956  $\text{cm}^{-1}$ ;  $^1\text{H}$  NMR (500 MHz,  $\text{CDCl}_3$ ):  $\delta$  0.91 (d,  $J = 3.9$  Hz, 3H), 0.93 (d,  $J = 3.9$  Hz, 3H), 1.37 (dd,  $J = 14.6, 7.3$  Hz, 2H), 1.61 (d,  $J = 2.7$  Hz, 1H), 1.75-1.84 (m, 1H), 2.05-2.14 (m, 1H), 2.17-2.25 (m, 1H), 3.77 (m, 1H), 4.72 (ddt, 2H,  $J = 0.8, 7.0, 3.1$  Hz), 5.14 (tt, 1H,  $J = 7.0, 7.0$  Hz);  $^{13}\text{C}$  NMR (125 MHz,  $\text{CDCl}_3$ ):  $\delta$  17.8, 22.4, 37.3, 46.2, 69.5, 75.1, 86.5, 209.7. GC/MS (EI)  $m/z$  140 ( $\text{M}^+$ , 7), 97 (21), 87 (34), 43 (100); Anal. Calcd for  $\text{C}_9\text{H}_{16}\text{O}$ : C, 77.09; H, 11.50; O, 11.41. Found: C, 77.32; H, 10.88.  
Chiral HPLC analysis, Chiralcel OD-H. 0.8 mL/min, Hexanes:*i*-PrOH = 98:2,  $t_R$  17.3 min (major) : 21.4 min (minor), 91% *ee*

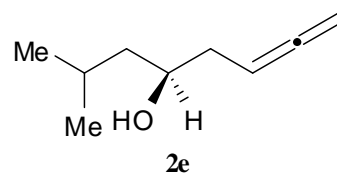

**(-)-(R)-1-cyclohexylpenta-3,4-dien-1-ol (2f):**

TLC, *R<sub>f</sub>* 0.31 (3:1 Hexanes/EtOAc);  $[\alpha]_D^{25} = -2.41$  (*c* = 0.9 in CHCl<sub>3</sub>); FT-IR (film): 3435, 3031, 2926, 2855, 1954, 1290, 1242 cm<sup>-1</sup>; <sup>1</sup>H NMR (300MHz, CDCl<sub>3</sub>):  $\delta$  0.95-1.44 (m, 6H), 1.60-1.87 (m, 5H), 2.00-2.31 (m, 3H), 3.36-3.40 (m, 1H), 4.62-4.70 (m, 2H), 5.10 (m, 1H); <sup>13</sup>C NMR (75MHz, CDCl<sub>3</sub>):  $\delta$  26.2, 26.3, 26.5, 28.1, 29.1, 33.5, 43.0, 74.6, 75.3, 86.8, 209.2; GC/MS (EI) *m/z* 180 (*M*<sup>+</sup>, 7), 127 (34), 97 (100).

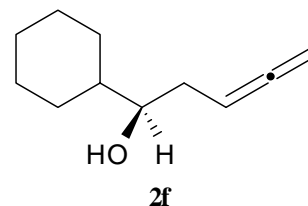

Chiral HPLC analysis, Chiralcel OD-H. 0.8 mL/min, Hexanes:*i*-PrOH = 97:3, *t<sub>R</sub>* 23.4 min (major) : 29.5 min (minor), 90% *ee*

**(+)-(R)-1-phenylpenta-3,4-dien-1-ol (2g):**

TLC, *R<sub>f</sub>* 0.37 (3:1 Hexanes/EtOAc);  $[\alpha]_D^{23} = +49.8$  (*c* = 1.1 in CHCl<sub>3</sub>); FT-IR (film): 3382, 3064, 3029, 2910, 1955, 1251, 1035, 752, 688 cm<sup>-1</sup>; <sup>1</sup>H NMR (500MHz, CDCl<sub>3</sub>):  $\delta$  2.08 (d, *J* = 3.0 Hz, 1H), 2.44-2.49 (m, 2H), 4.71 (dt, *J* = 7.0, 3.0 Hz, 2H), 4.78 (m, 1H), 5.11 (tt, *J* = 7.0, 7.0 Hz, 1H), 7.26-7.29 (m, 1H), 7.32-7.36 (m, 4H); <sup>13</sup>C NMR (125MHz, CDCl<sub>3</sub>):  $\delta$  38.7, 73.9, 75.3, 86.3, 126.1, 127.9, 128.7, 143.9, 209.8; MS (ESI) *m/z* (rel. intensity) 183 (*M*+Na<sup>+</sup>, 20).

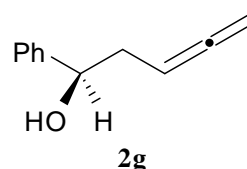

Chiral HPLC analysis, Chiralcel OD-H. 0.8 mL/min, Hexanes:*i*-PrOH = 98:2, *t<sub>R</sub>* 16.4 min (major) : 22.3 min (minor), 88% *ee*

**(+)-(R)-1-(4-bromophenyl)penta-3,4-dien-1-ol (2h):**

TLC, *R<sub>f</sub>* 0.4 (3:1 Hexanes/EtOAc);  $[\alpha]_D^{22} = +31.3$  (*c* = 0.8 in CHCl<sub>3</sub>); FT-IR (film): 3379, 2955, 2922, 1956, 1017, 754, cm<sup>-1</sup>; <sup>1</sup>H NMR (500 MHz, CDCl<sub>3</sub>):  $\delta$  2.14 (d, *J* = 5.5 Hz, 1H), 2.37-2.47 (m, 2H), 4.71 (m, 1H), 4.73 (dd, *J* = 7.0, 3.0 Hz, 2H), 5.10 (tt, *J* = 7.0, 7.0 Hz, 1H), 7.26 (m, 2H), 7.48 (m, 2H); <sup>13</sup>C NMR (125 MHz, CDCl<sub>3</sub>):  $\delta$  38.7, 73.2, 75.5, 86.0, 121.6, 127.9, 131.7, 142.9, 209.8; MS (ESI) *m/z* (rel. intensity) 261 (*M*+Na<sup>+</sup>, 11).

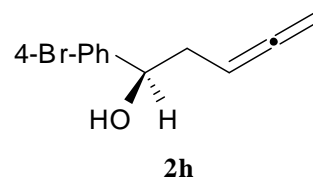

Chiral HPLC analysis, Chiralcel OD-H. 0.8 mL/min, Hexanes:*i*-PrOH = 98:2, *t<sub>R</sub>* 14.9 min (major) : 22.7 min (minor), 91% *ee*

**(+)-(R)-1-phenylhepta-1,5,6-trien-3-ol (2i):**

Purified by silica gel (deactivated with 3% Et<sub>3</sub>N in hexanes) chromatography. TLC, *R<sub>f</sub>* 0.37 (3:1 Hexanes/EtOAc);  $[\alpha]_D^{25} = +2.89$  (*c* = 1.0 in CHCl<sub>3</sub>); FT-IR

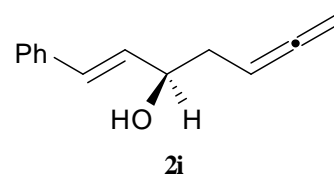

(film): 3384, 3058, 3026, 2911, 1955, 1251, 1026, 749, 693  $\text{cm}^{-1}$ ;  $^1\text{H}$  NMR (500 MHz,  $\text{CDCl}_3$ ):  $\delta$  1.85 (bs, 1H), 2.29-2.43 (m, 2H), 4.40 (m, 1H), 4.74 (dt,  $J = 2.5, 7.0$  Hz, 2H), 5.12 (tt,  $J = 7.0, 7.0$  Hz, 1H), 6.26 (dd,  $J = 15.7, 6.3$  Hz, 1H), 6.63 (d,  $J = 15.7$  Hz, 1H), 7.25 (m, 1H), 7.30 (m, 2H), 7.40 (m, 2H);  $^{13}\text{C}$  NMR (125 MHz  $\text{CDCl}_3$ ):  $\delta$  26.9, 72.3, 75.3, 85.9, 126.7, 127.9, 128.8, 130.9, 131.6, 136.9, 209.9; MS (ESI)  $m/z$  (rel. intensity) 209 ( $\text{M}+\text{Na}^+$ , 31).

Chiral HPLC analysis, Chiralcel OD-H. 0.8 mL/min, Hexanes:*i*-PrOH = 97:3,  $t_R$  13.7 min (major) : 21.7 min (minor), 81% *ee*

**(+)-(R)-phenylhepta-5,6-dien-1-yn-3-ol (2j):**

Purified by silica gel (deactivated with 3%  $\text{Et}_3\text{N}$  in hexanes)

chromatography. TLC,  $R_f$  0.31 (5:1 Hexanes/EtOAc);  $[\alpha]_D^{23} = +9.93$  ( $c = 0.8$  in  $\text{CHCl}_3$ ); FT-IR (film): 3499, 3053,

2984, 2351, 1955, 1265, 747  $\text{cm}^{-1}$ ;  $^1\text{H}$  NMR (300MHz,  $\text{CDCl}_3$ ):  $\delta$  2.45 (m, 1H), 2.57-2.50 (m, 2H), 4.71-4.67 (m, 1H), 4.78-4.74 (m, 2H), 5.26

(m, 1H), 7.45-7.30 (m, 5H);  $^{13}\text{C}$  NMR (75MHz,  $\text{CDCl}_3$ )  $\delta$  37.2, 62.5, 75.2, 85.1, 85.3, 89.3, 122.6, 128.4, 128.5, 131.8, 209.8; MS (ESI)  $m/z$  (rel. intensity) 207 ( $\text{M}+\text{Na}^+$ , 44); Anal. Calcd for  $\text{C}_{13}\text{H}_{12}\text{O}$ : C, 84.75; H, 6.57; O, 8.68. Found: C, 84.51; H, 6.44.

Chiralcel OD-RH. 0.8 mL/min,  $\text{CH}_3\text{CN}:\text{H}_2\text{O} = 7:3$ ,  $t_R$  14.7 min (minor) : 20.1 min (major),  $^1\text{H}$  NMR analysis of (+)-MTPA ester:  $\delta$  5.19 (minor), 5.01 (major), 84% *ee*

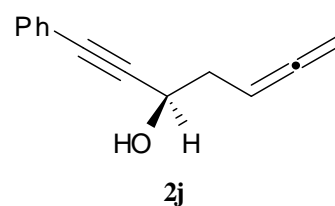

**(+)-(S)-5,6-dihydro-3-methyl-6-phenethylpyran-2-one (7a):**

A dried stainless autoclave was charged with **2a** (190 mg, 1.02 mmol), triethyl amine (155 mg, 1.53 mmol) and  $\text{Ru}_3(\text{CO})_{12}$  (6.5 mg, 0.01 mmol) in 1,4-dioxane. After the reaction system was flushed with 20 atm of CO three times, it was pressurized

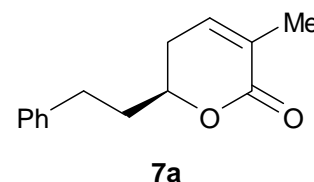

to 20 atm of CO and stirred at 100  $^\circ\text{C}$  for 7 h. The autoclave was allowed to cool down rt and the CO was released carefully in the fume hood. The result mixture was transferred into a round bottom flask with ether and the volatiles were removed under reduced pressure. Final purification was effected by chromatography (Hexanes:EtOAc = 5:1) to afford **7a** (187 mg, 0.84 mmol, 83%) as a colorless oil: TLC,  $R_f$  0.32 (4:1 Hexanes/EtOAc);  $[\alpha]_D^{25} = +39.1$  ( $c = 0.8$  in  $\text{CHCl}_3$ ); FT-IR (film): 3025, 2951, 1713, 1454, 756  $\text{cm}^{-1}$ ;  $^1\text{H}$  NMR (500MHz,  $\text{CDCl}_3$ ):  $\delta$  1.83-1.87 (m, 4H), 1.98-2.12 (m, 1H), 2.31-2.36 (m, 2H), 2.70 (m, 1H), 2.80 (m, 1H), 4.31 (m, 1H), 6.49 (m, 1H), 7.13 (m, 3H), 7.23 (m, 2H);  $^{13}\text{C}$  NMR (125MHz,  $\text{CDCl}_3$ ):  $\delta$  17.2, 30.0, 31.2, 36.7, 77.3, 126.3, 127.8, 128.7, 128.8, 139.0, 141.2, 166.2; MS (ESI)  $m/z$  (rel. intensity) 207 ( $\text{M}+\text{Na}^+$ , 44).

**(+)-(S)-3,6-dimethyl-5,6-dihydro-2H-pyran-2-one (7b):**

TLC,  $R_f$  0.31 (3:1 Hexanes/EtOAc);  $[\alpha]_D^{25} = +181.5$  ( $c = 1.2$  in  $\text{CHCl}_3$ ); FT-IR (film): 2981, 2931, 1720, 1387, 1374, 1246, 1125  $\text{cm}^{-1}$ ;  $^1\text{H}$  NMR (500MHz,  $\text{CDCl}_3$ ):  $\delta$  1.43 (d,  $J = 6.2$  Hz, 3H), 1.93 (d,  $J = 1.7$  Hz, 3H), 2.30 (m, 2H), 4.54 (m, 1H), 6.57 (m, 1H);  $^{13}\text{C}$  NMR (125MHz,  $\text{CDCl}_3$ ):  $\delta$  17.2, 21.0, 31.8, 75.0, 128.6, 139.0, 166.3.

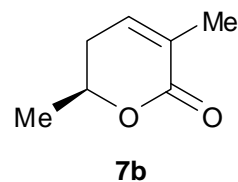

**(-)-(3S,6R)-3,6-dimethyltetrahydro-2H-pyran-2-one (8):**

A flame-dried 15ml Schlenk flask containing 5% Pd/C (10 mg) was charged with dry EtOAc (5 mL). After the reaction system was carefully flushed with  $\text{H}_2$  gas two times, **7b** (110 mg, 0.87 mmol) in EtOAc (1 mL) was added. Reaction mixture was then cooled to 0 °C. Reaction mixture was stirred under  $\text{H}_2$  atmosphere (1 atm, balloon) for 5 h. After removal of catalyst by filtration on celite through a sintered glass funnel, the filtrate was concentrated under reduced pressure to afford crude product as fairly pure form. Final purification was effected by  $\text{SiO}_2$  chromatography (Hexanes:EtOAc = 3:1) to afford **8** (98 mg, 0.76 mmol, 88%) as a white solid: TLC,  $R_f$  0.32 (3:1 Hexanes/EtOAc);  $[\alpha]_D^{23} = -97.4$  ( $c = 0.8$  in  $\text{CHCl}_3$ ); FT-IR (film): 2978, 2874, 1736  $\text{cm}^{-1}$ ;  $^1\text{H}$  NMR (500MHz,  $\text{CDCl}_3$ ):  $\delta$  1.24 (d,  $J = 6.8$  Hz, 3H), 1.38 (d,  $J = 6.2$  Hz, 3H), 1.49-1.68 (m, 2H), 1.90-1.98 (m, 1H), 2.05-2.15 (m, 1H), 2.60(m, 1H), 4.48 (m, 1H);  $^{13}\text{C}$  NMR (125MHz,  $\text{CDCl}_3$ ):  $\delta$  17.4, 21.4, 25.9, 28.7, 33.3, 74.7, 176.4.

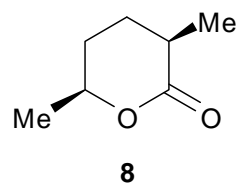

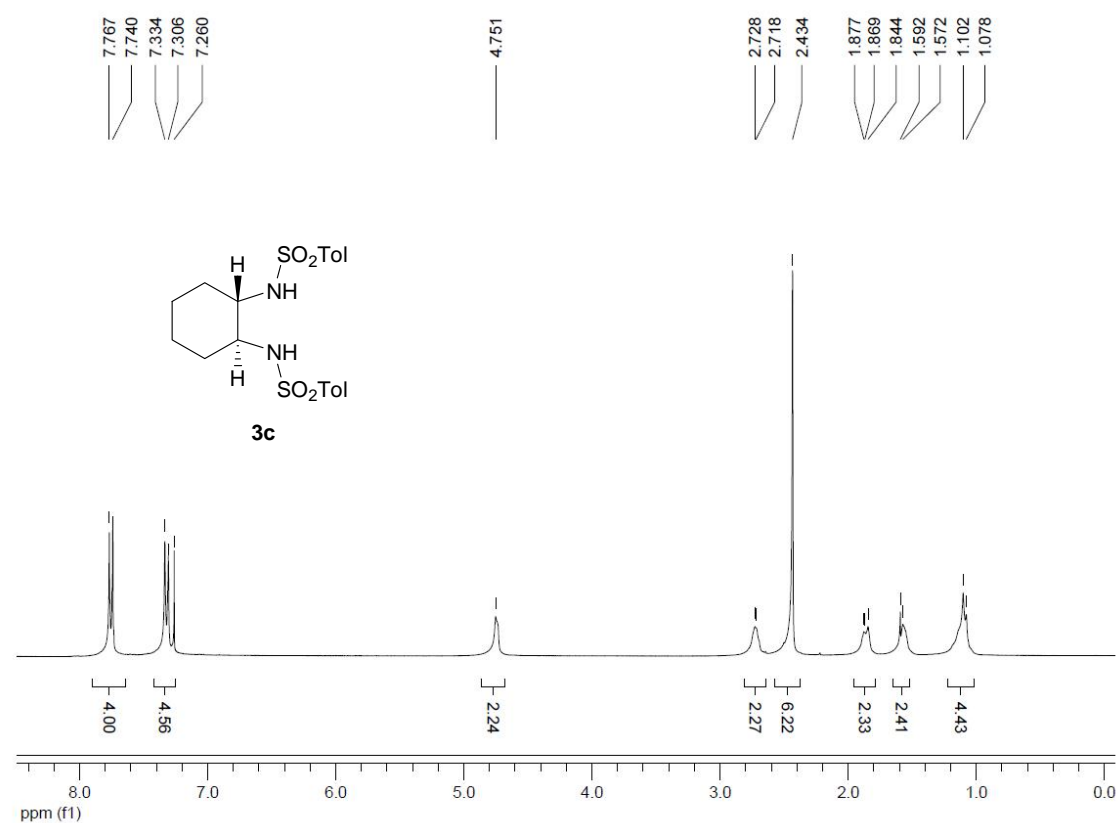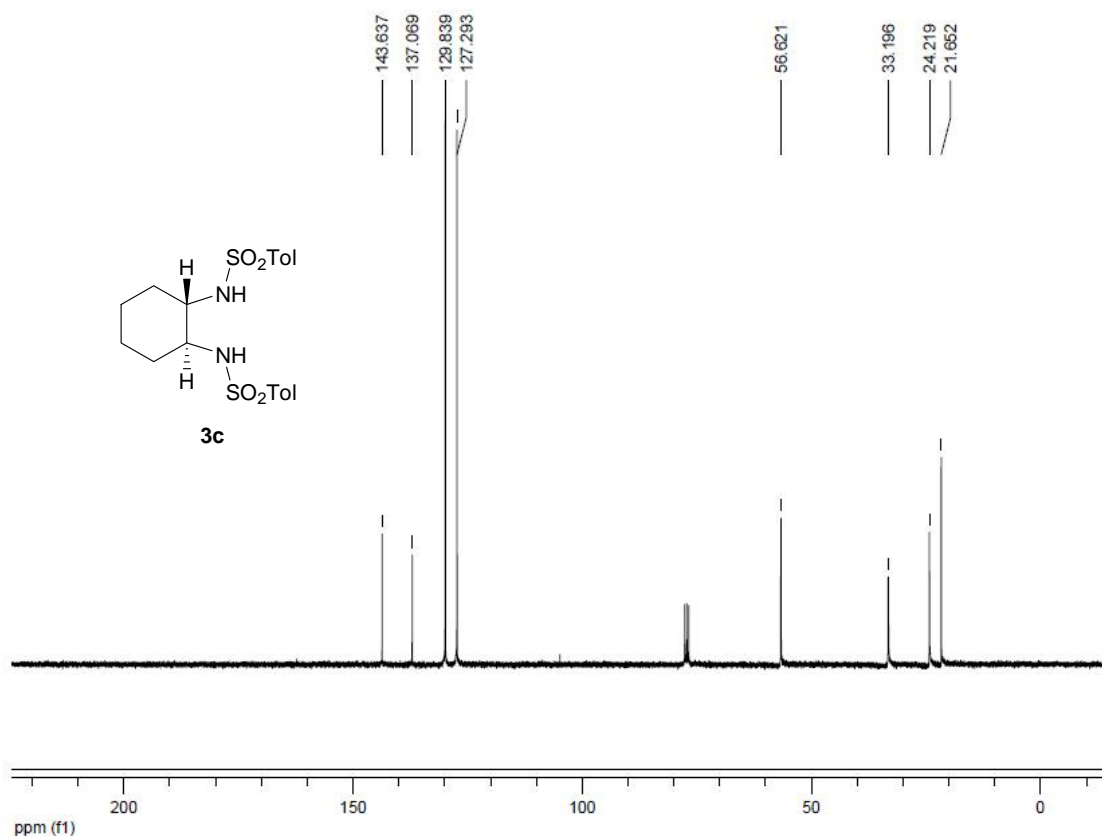



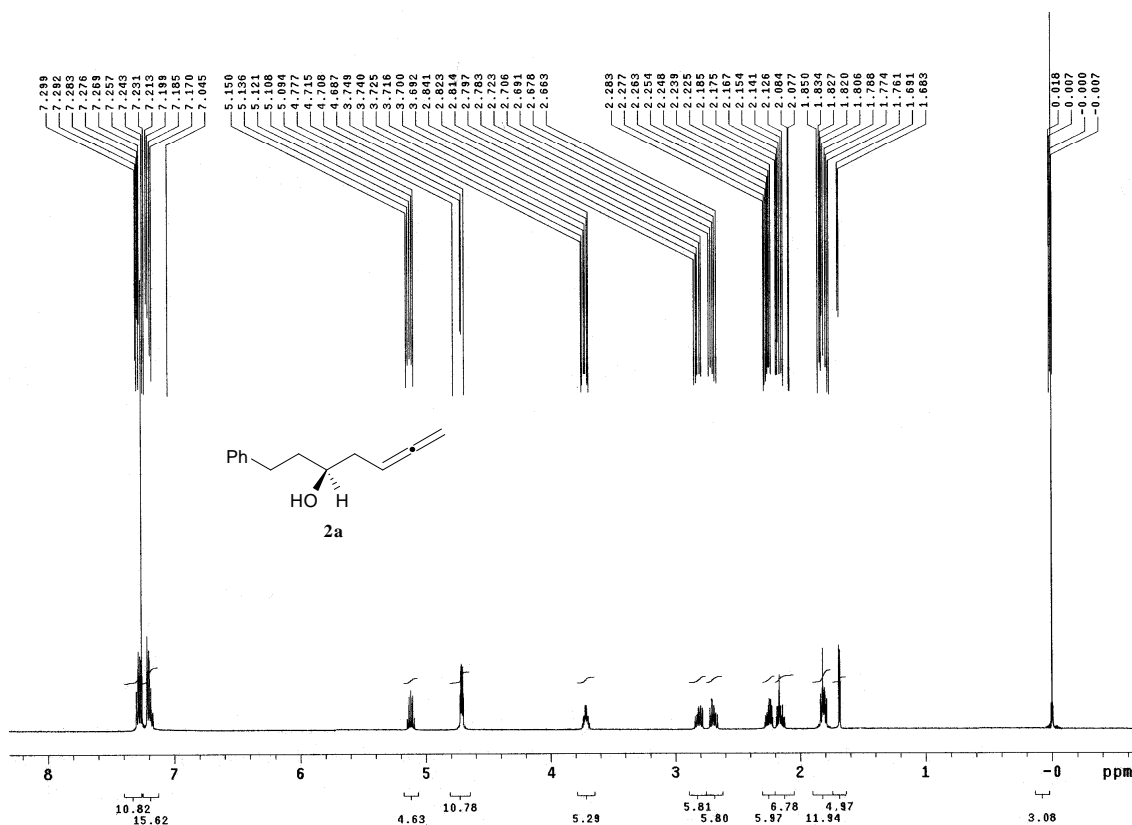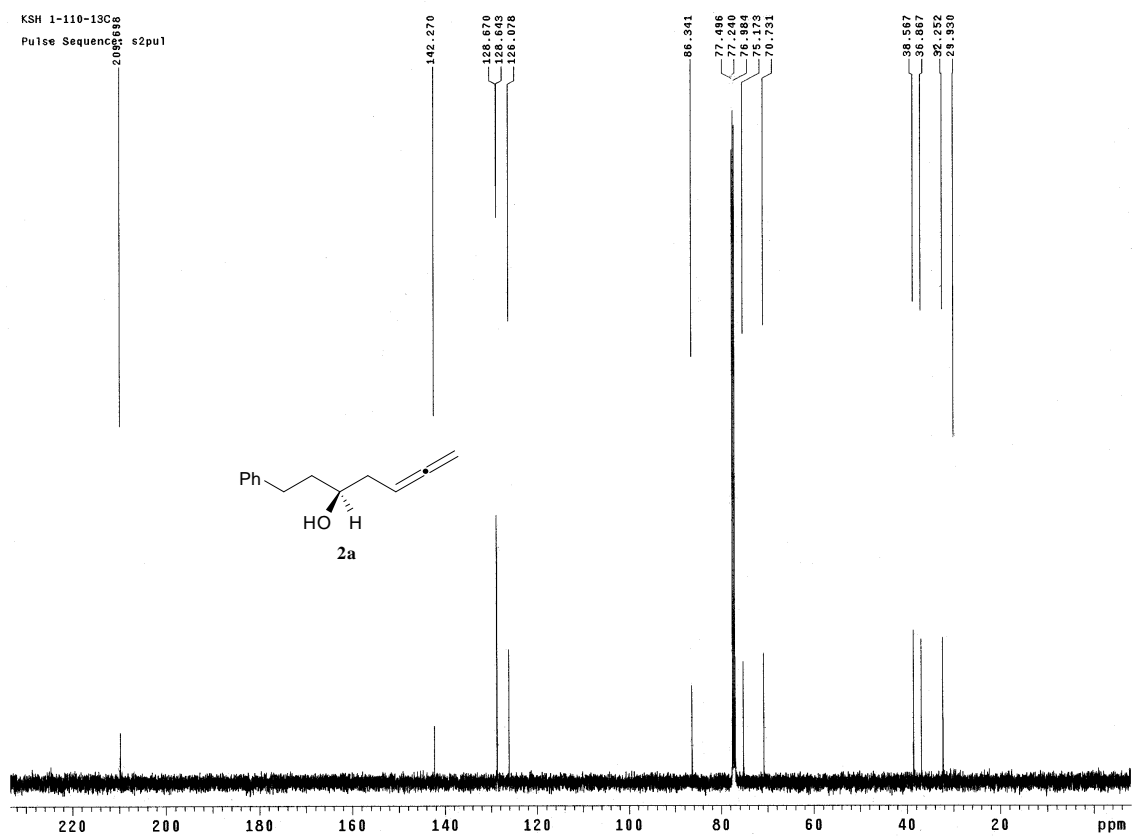

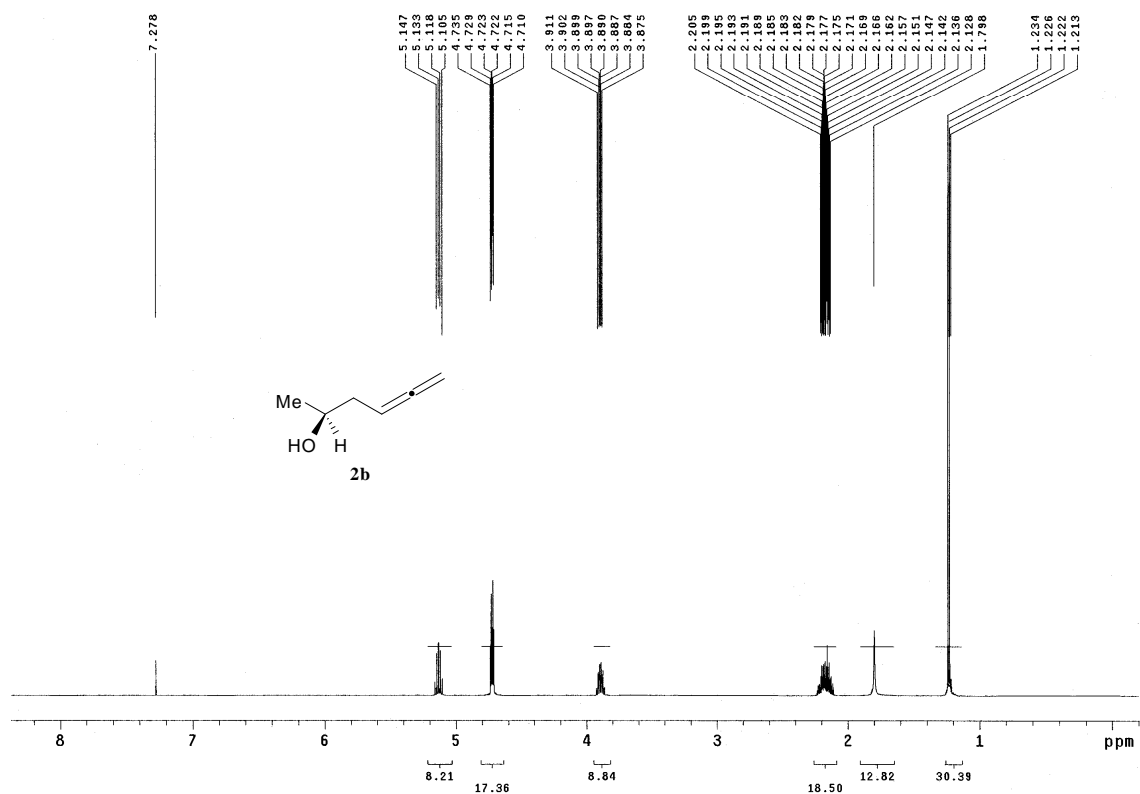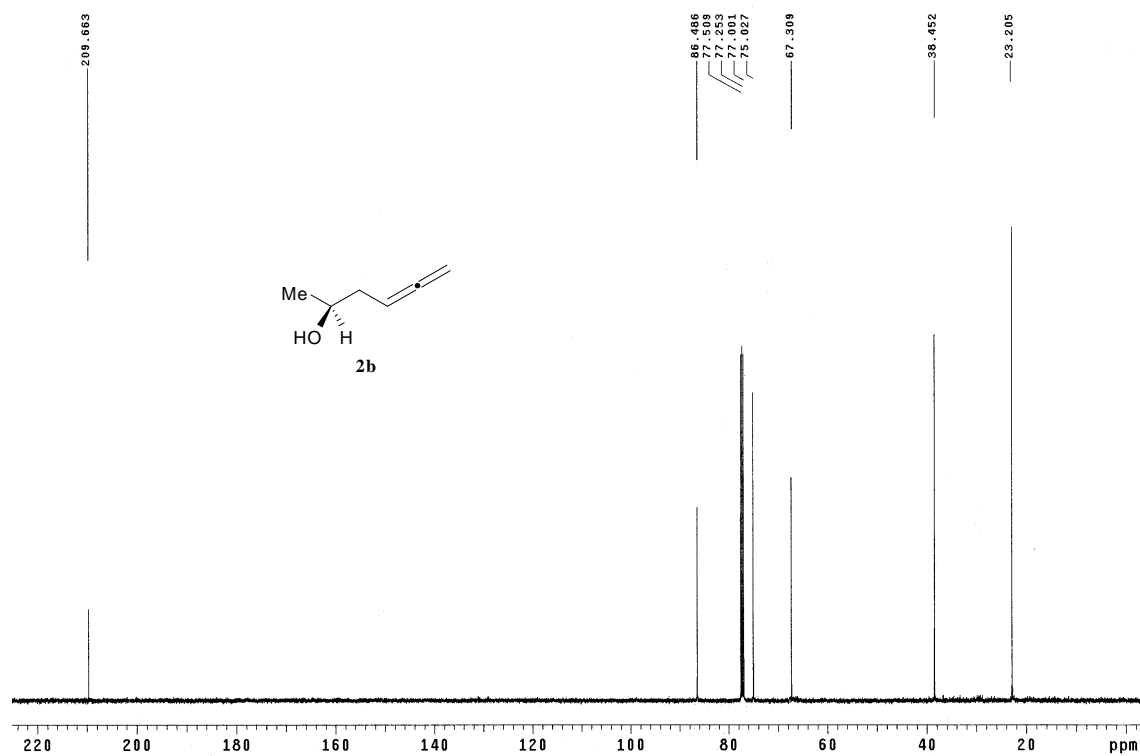

KSH-1-112  
Pulse Sequence: s2pu1

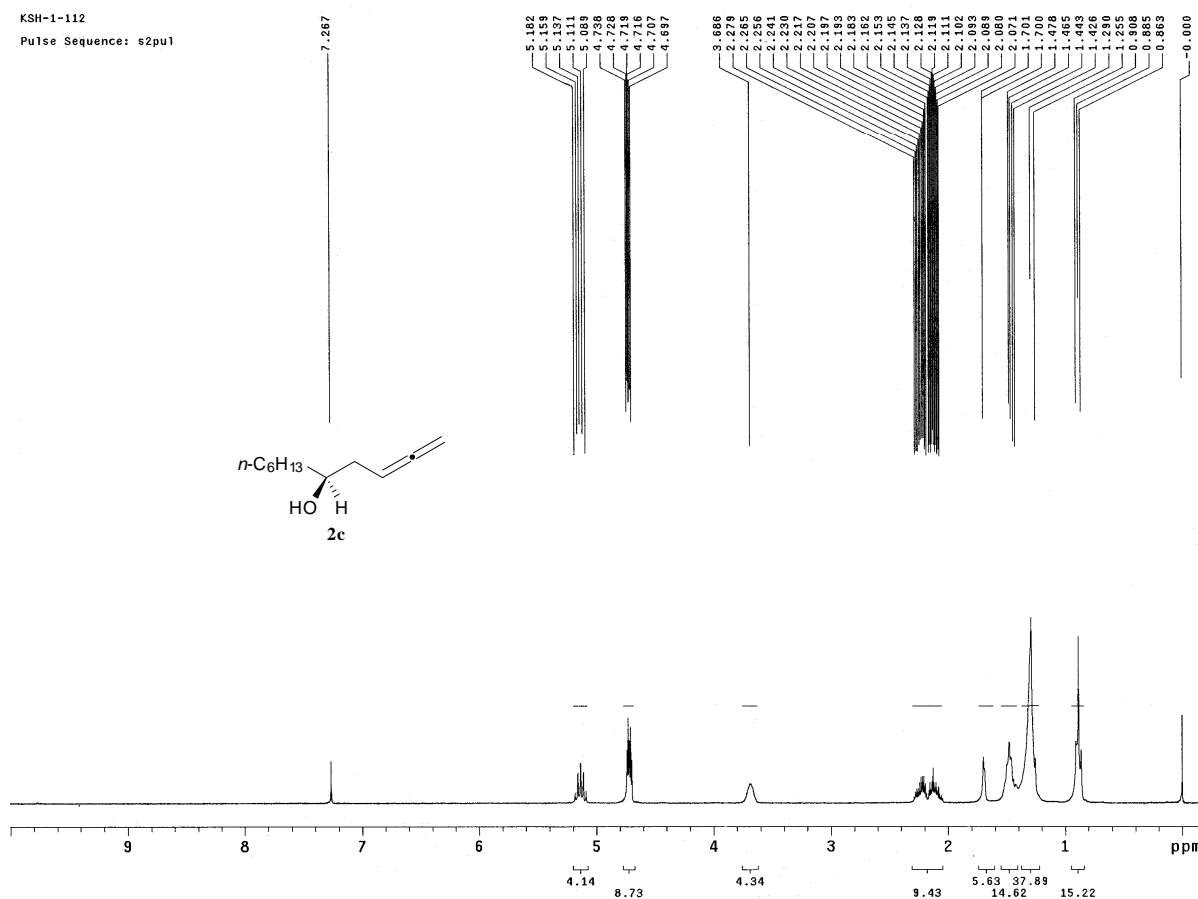

KSH-1-112-13C<sub>63</sub>  
Pulse Sequence: s2pu1

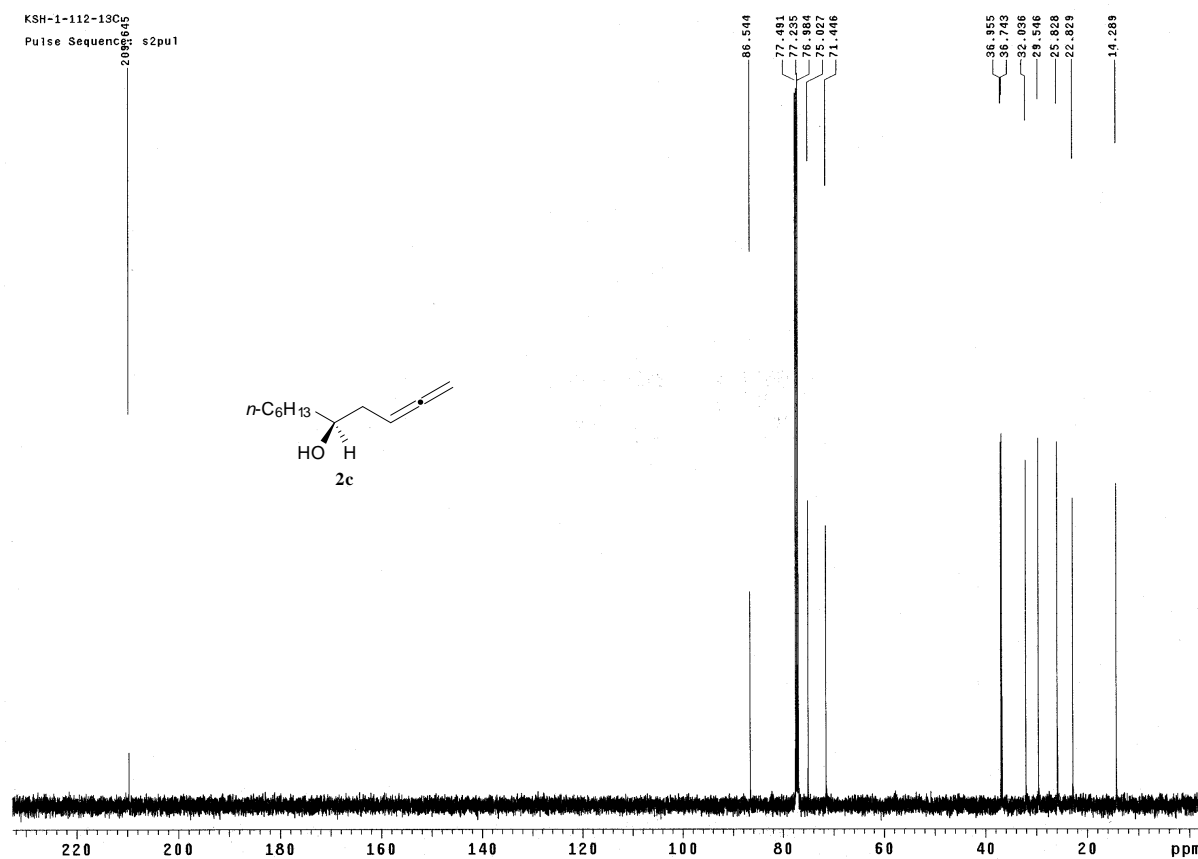

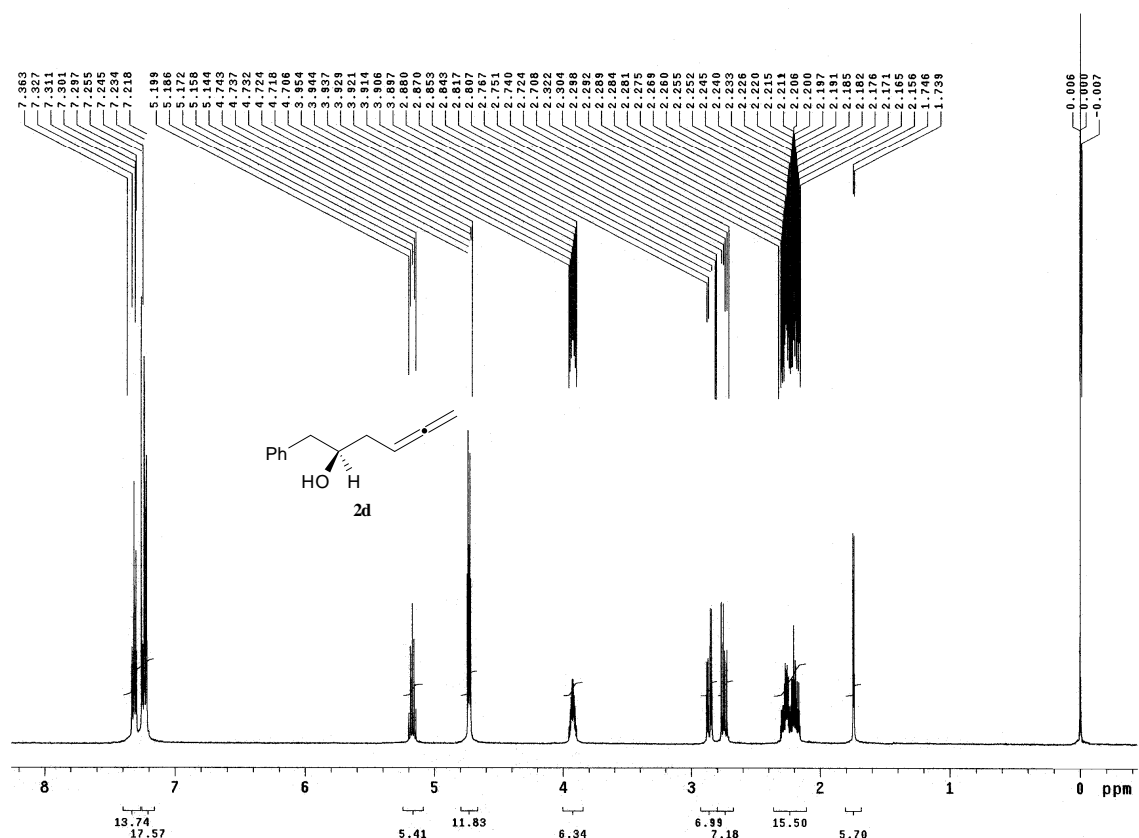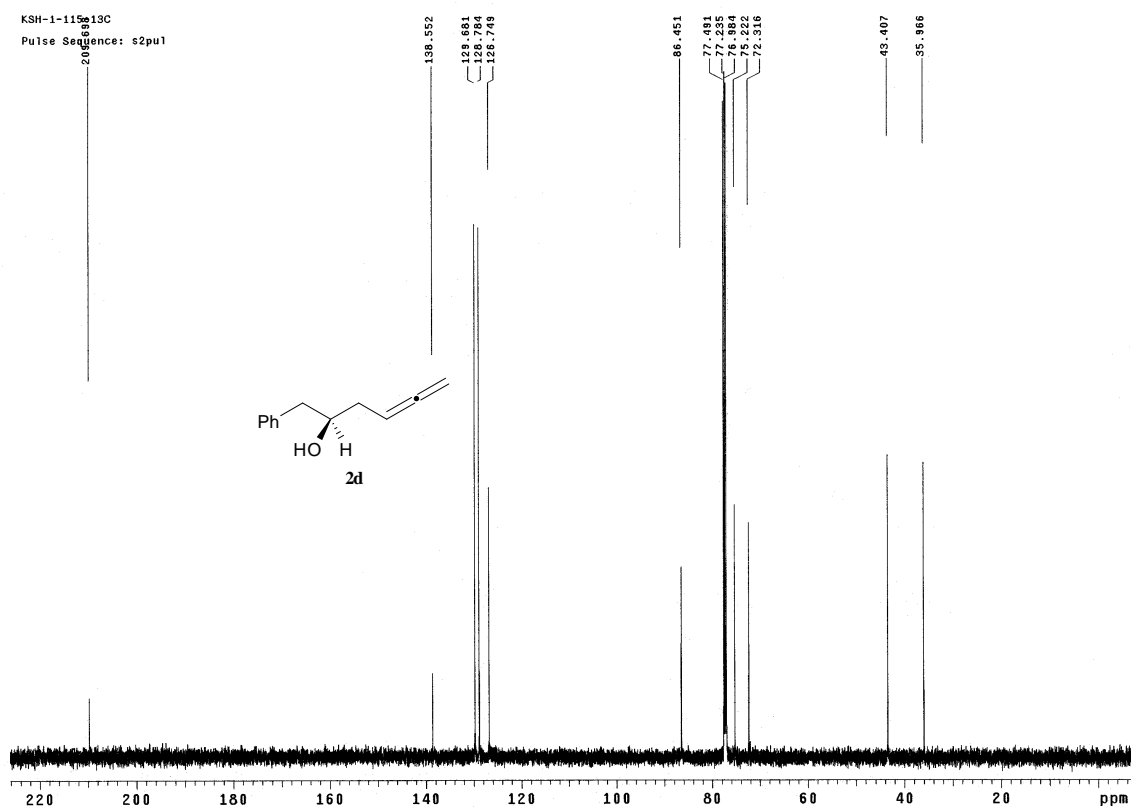

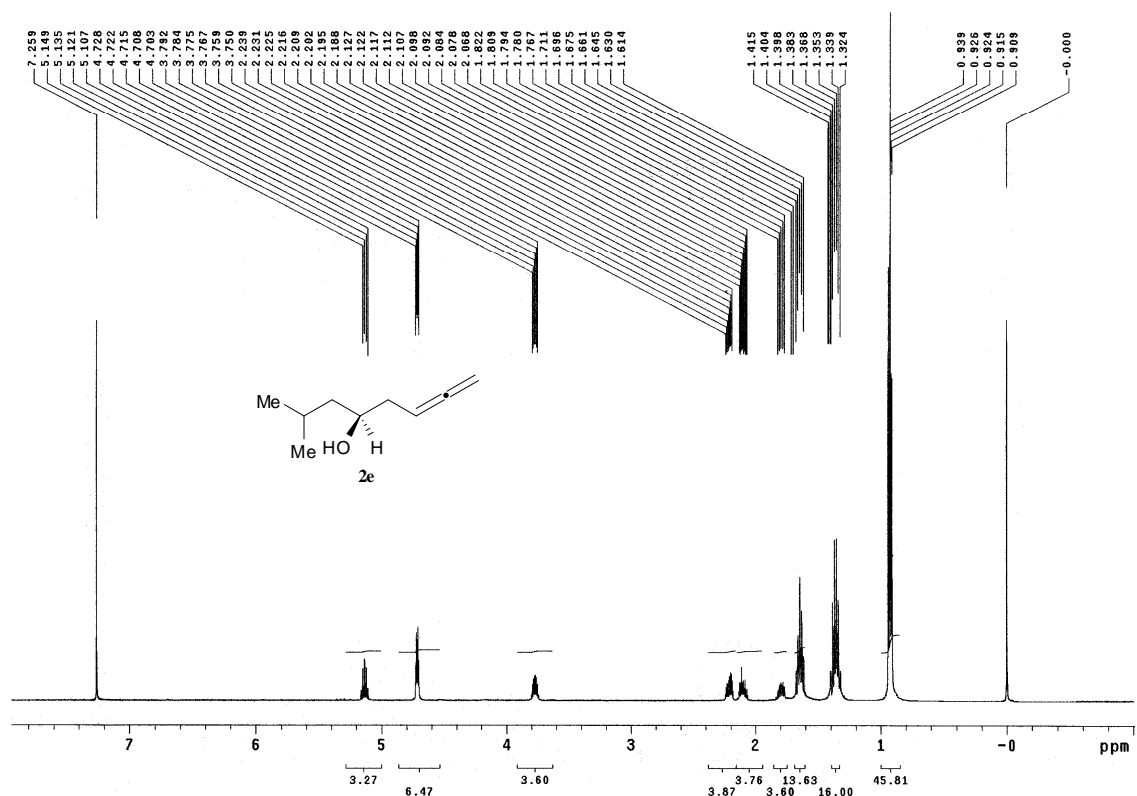

KSH-1-18A-13C  
Pulse Sequence: s2pul

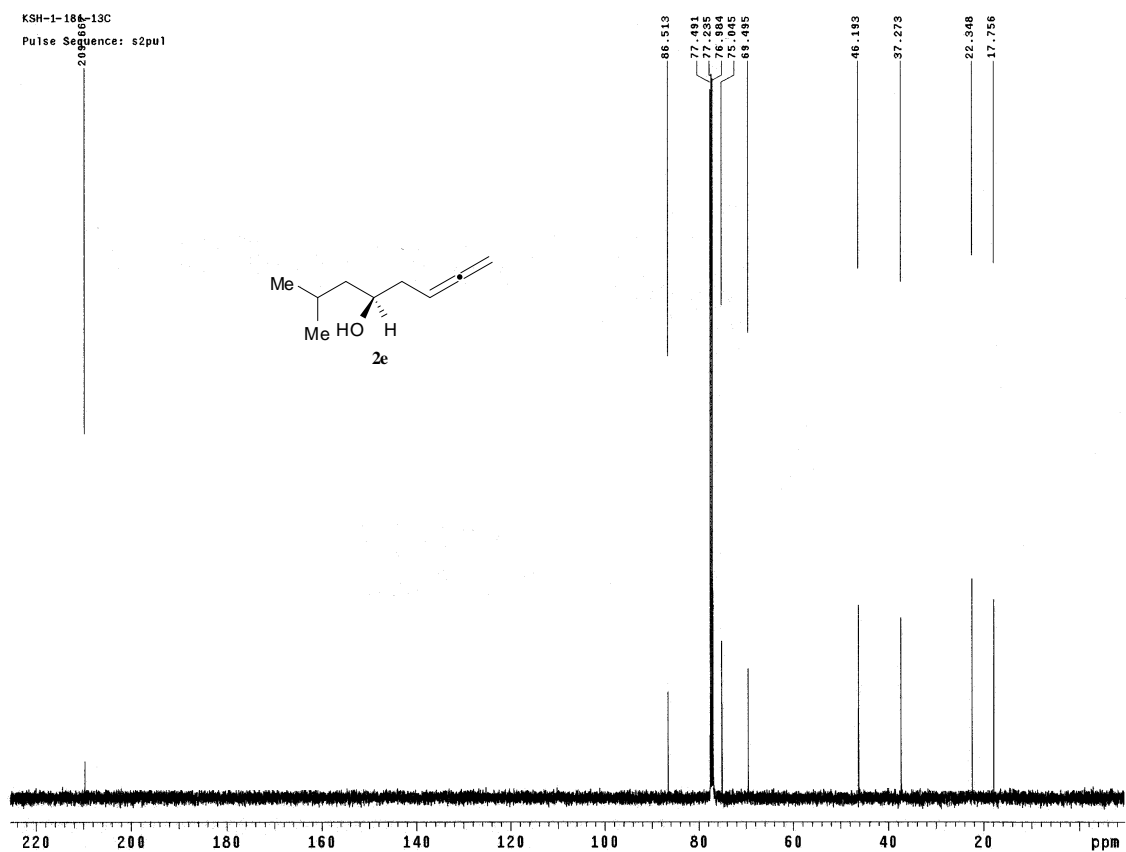

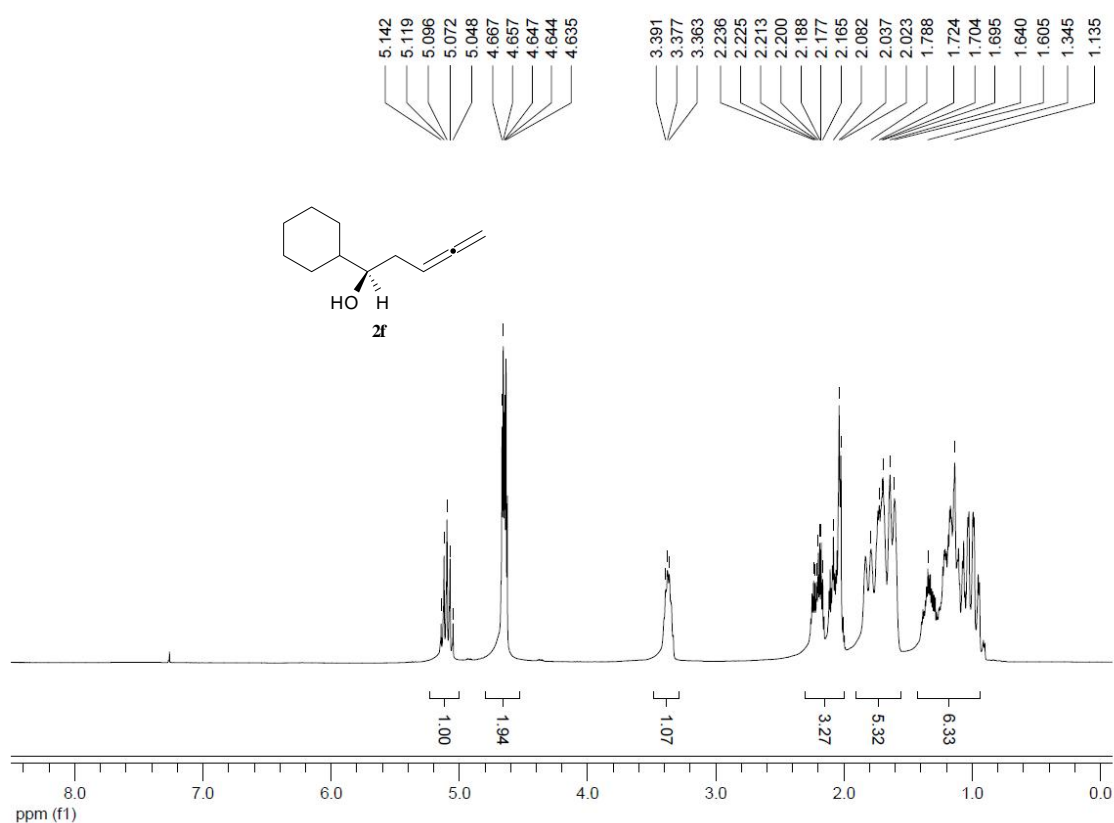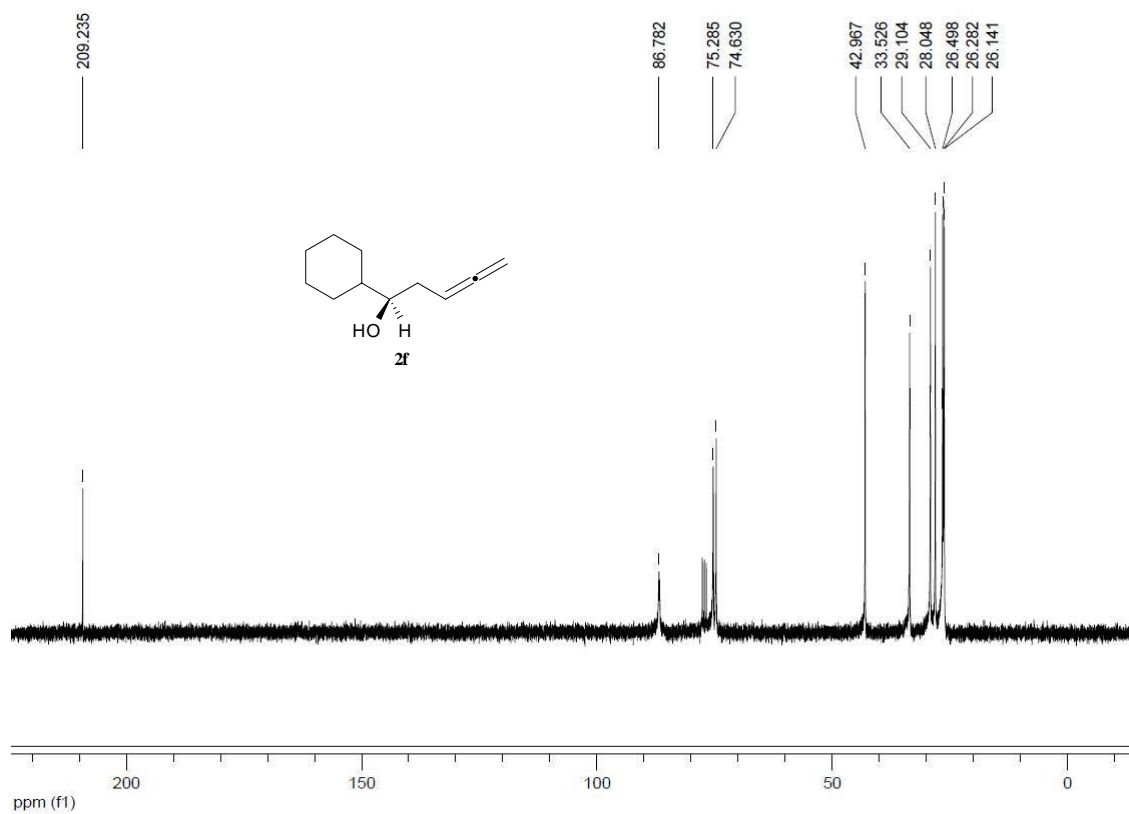

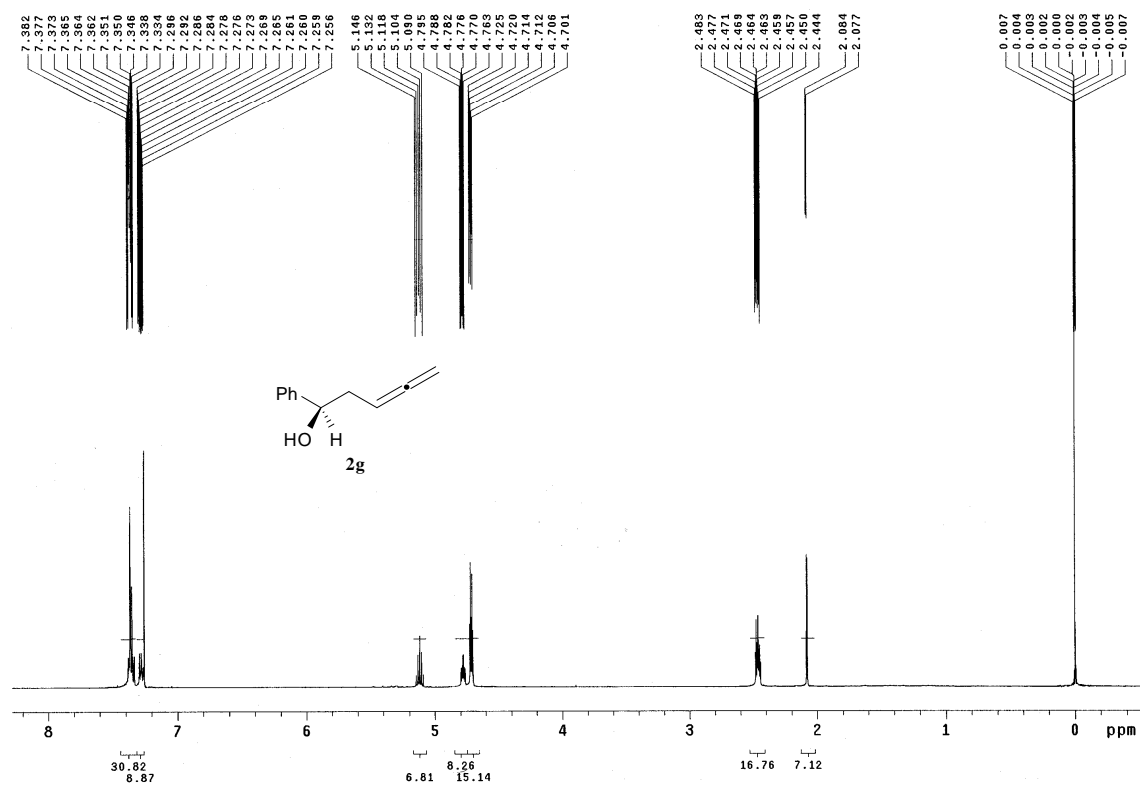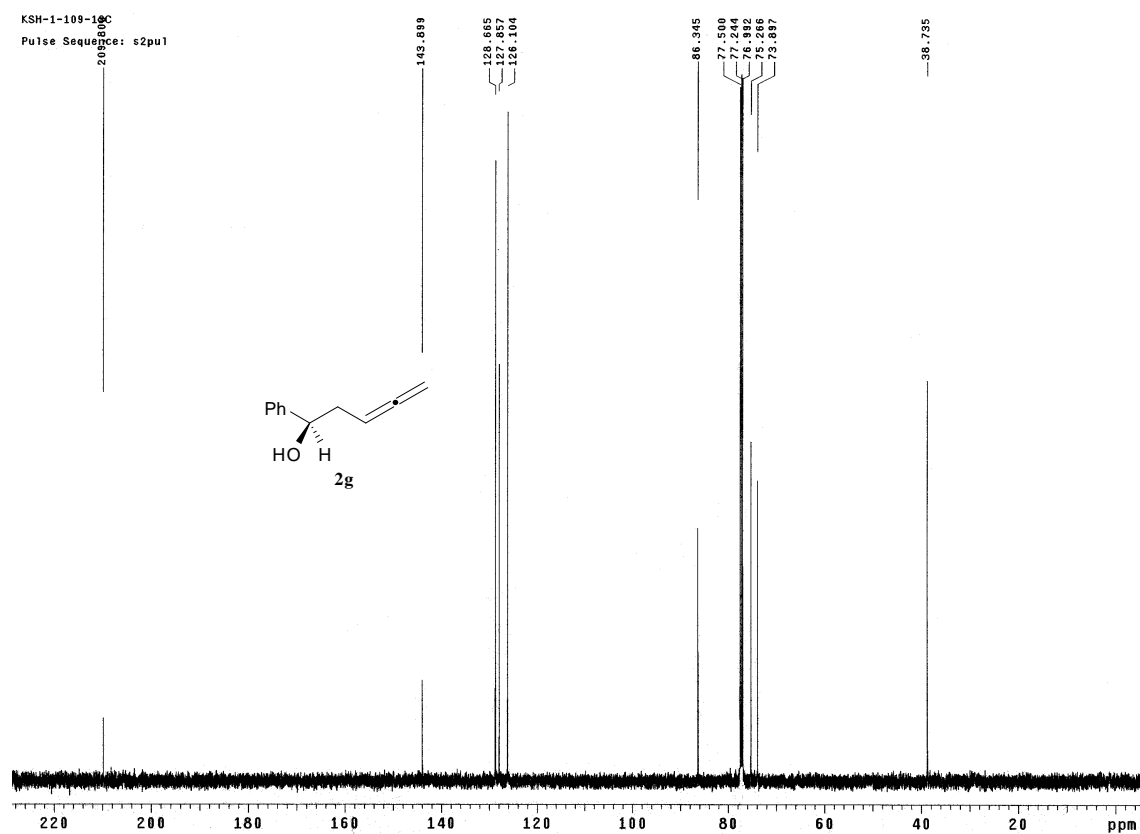

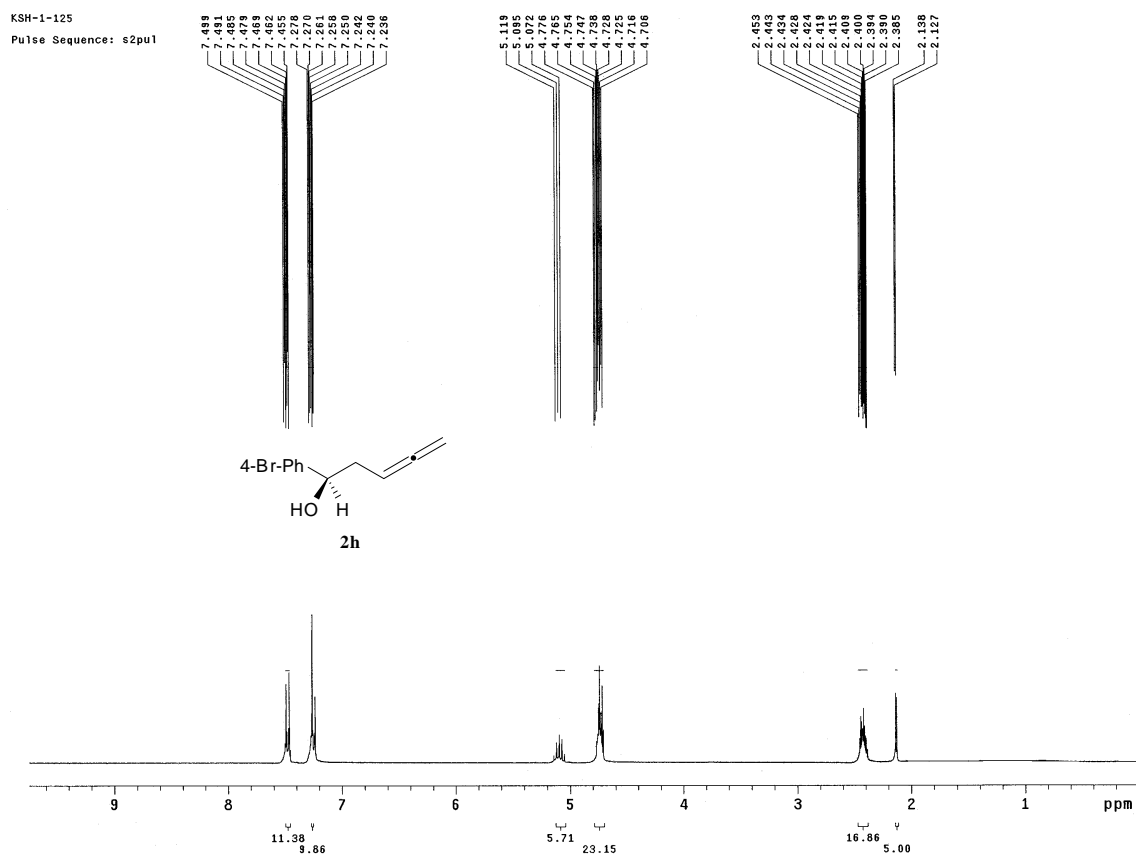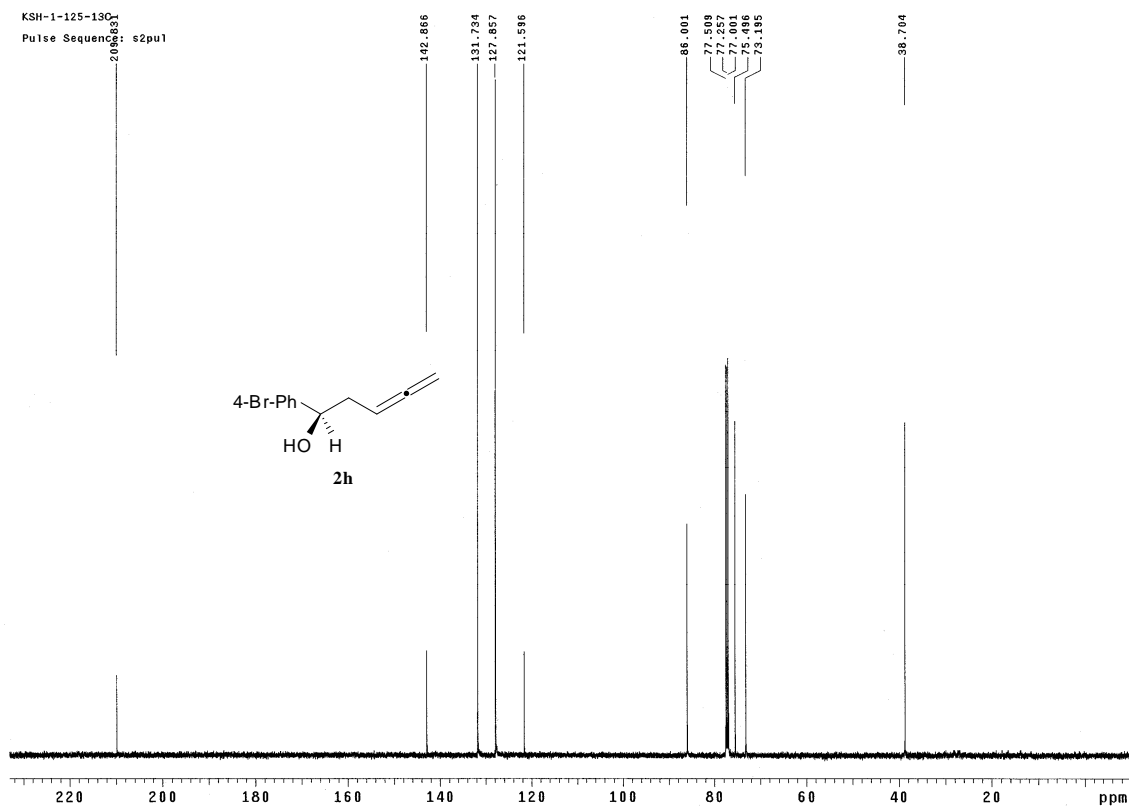



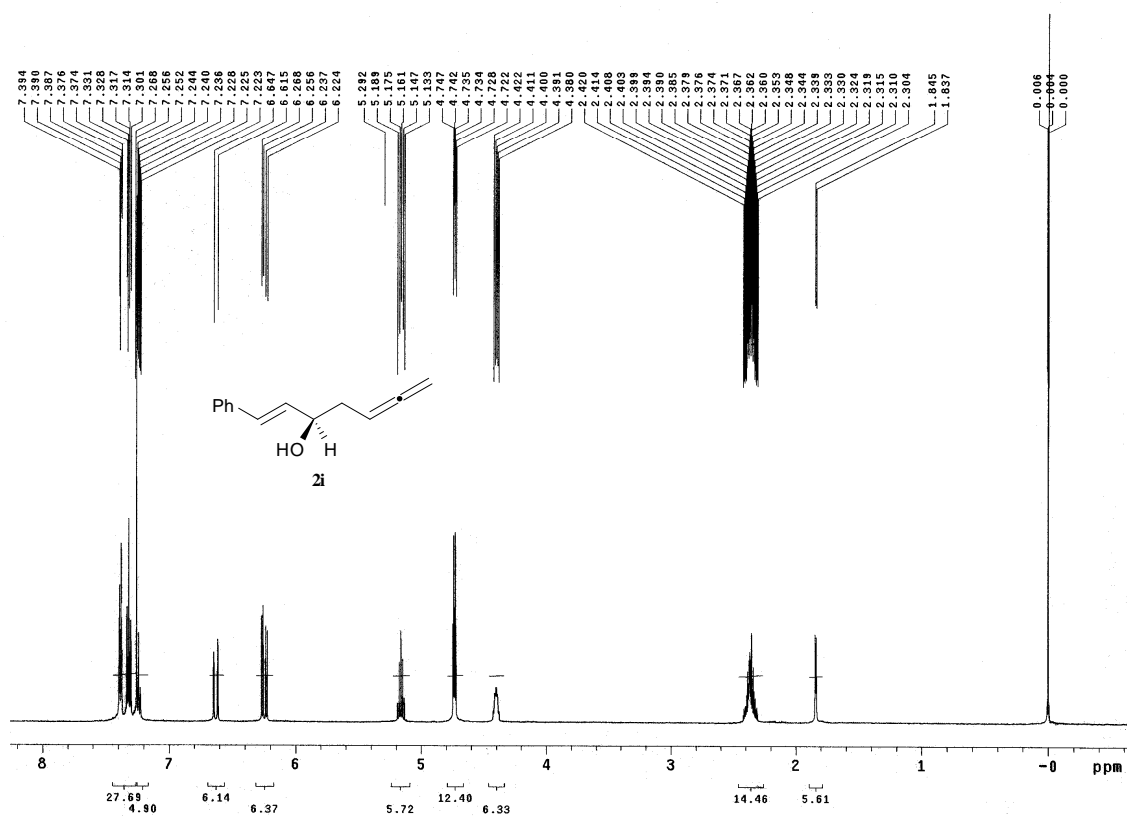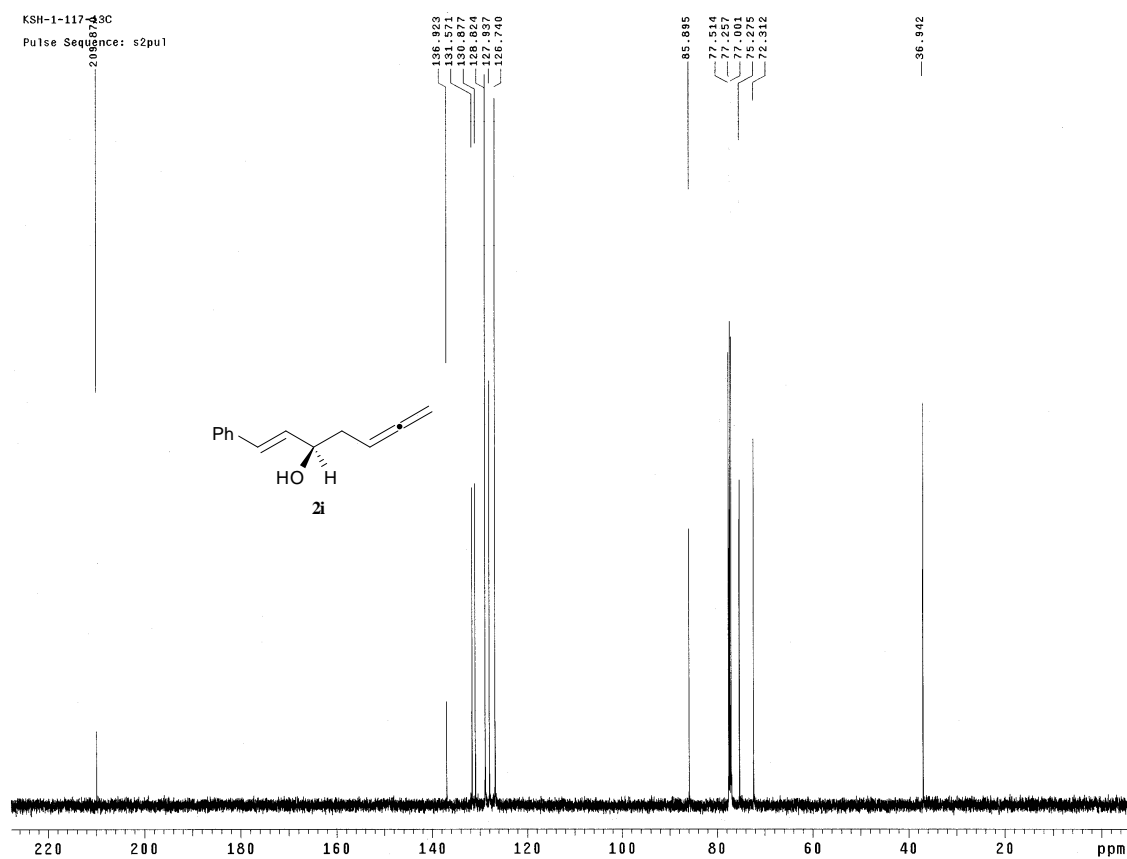

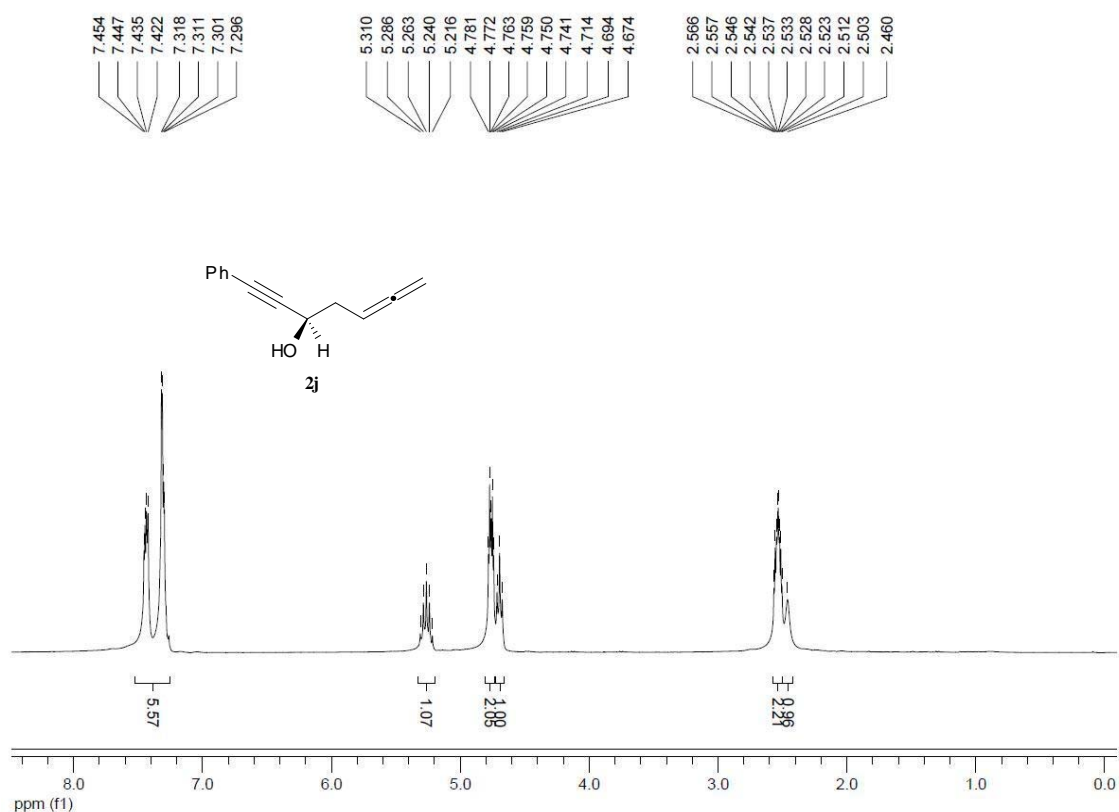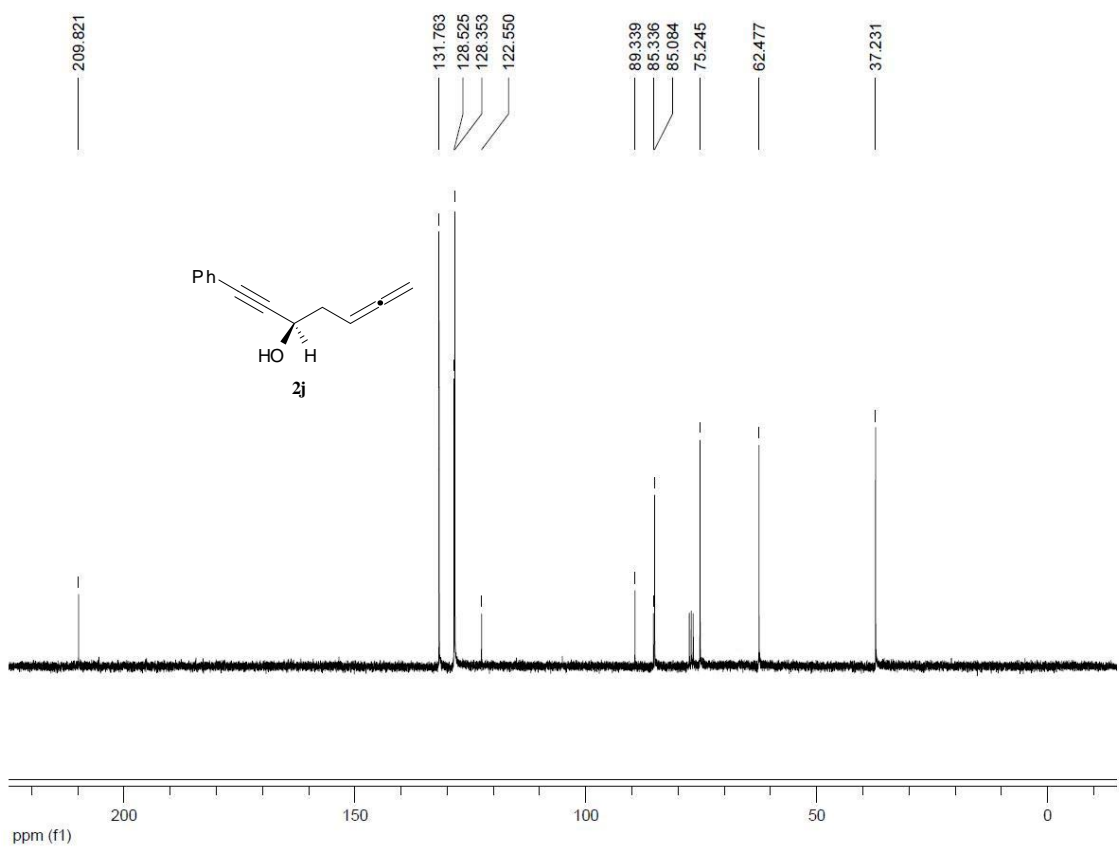

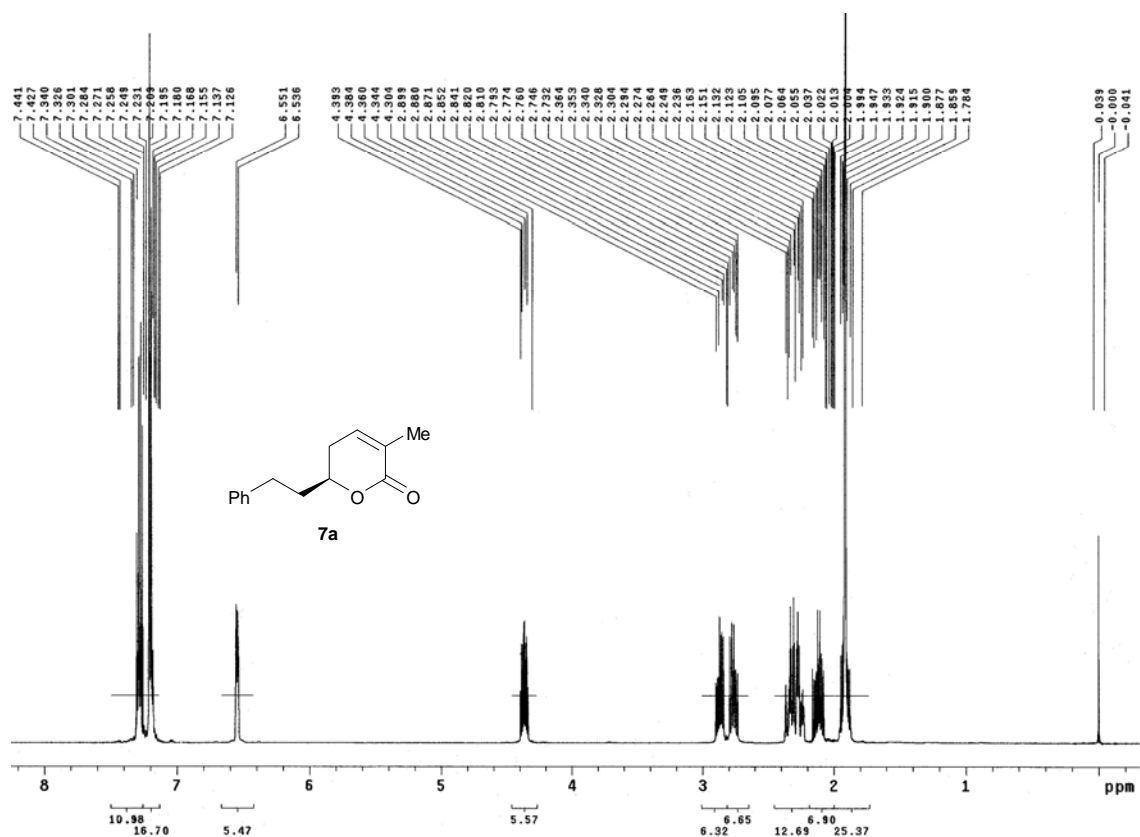

HYT-7-23-13C  
Pulse Sequence: s2pu1

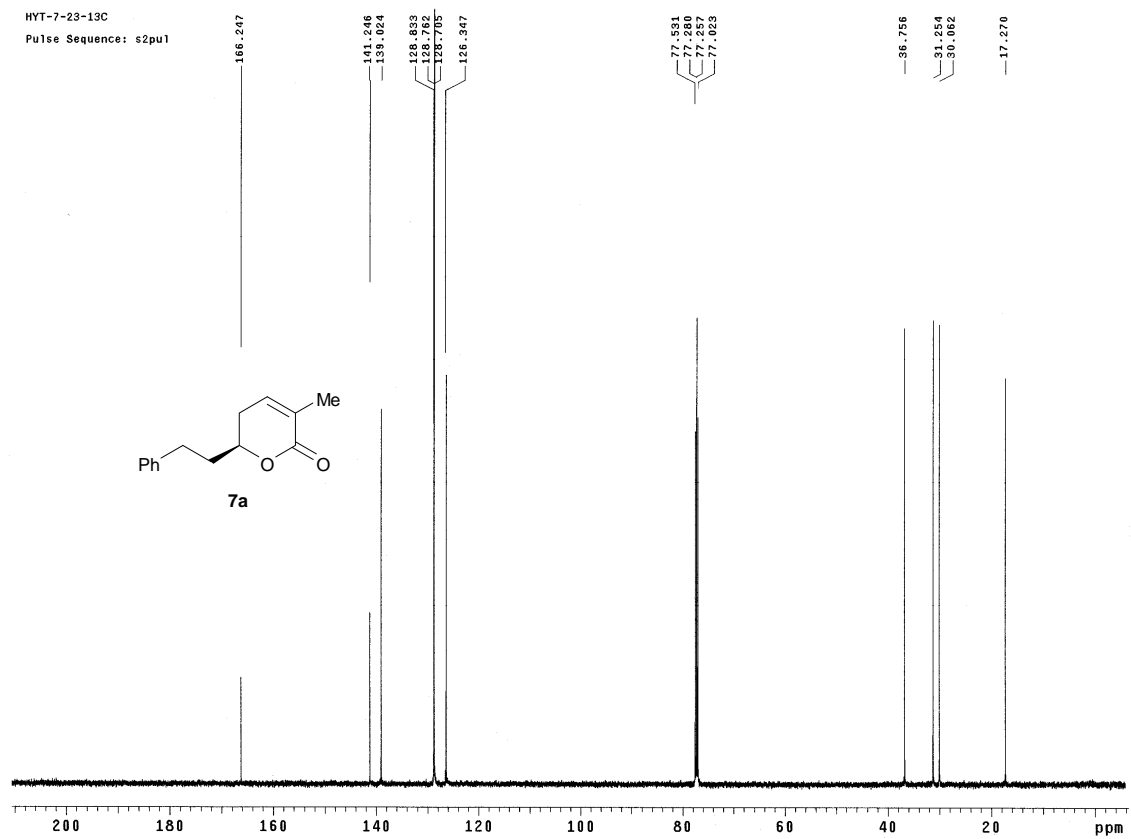



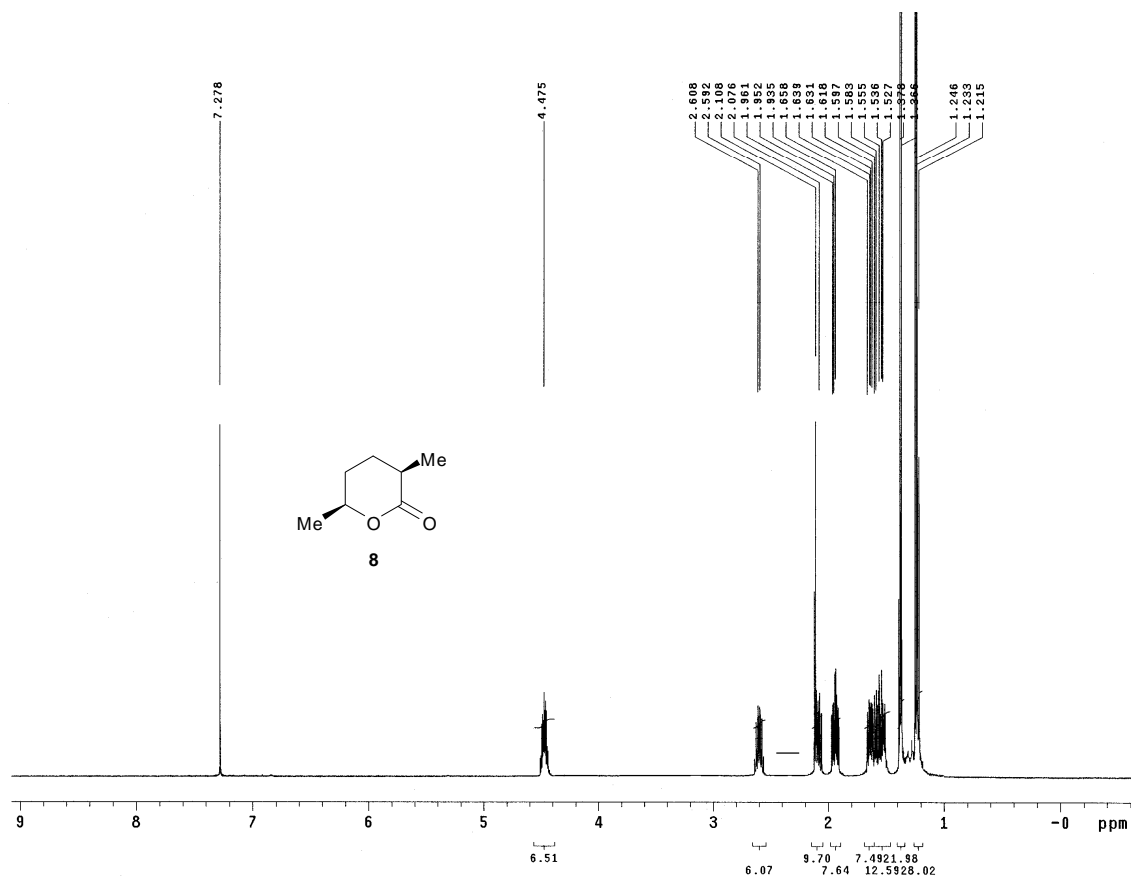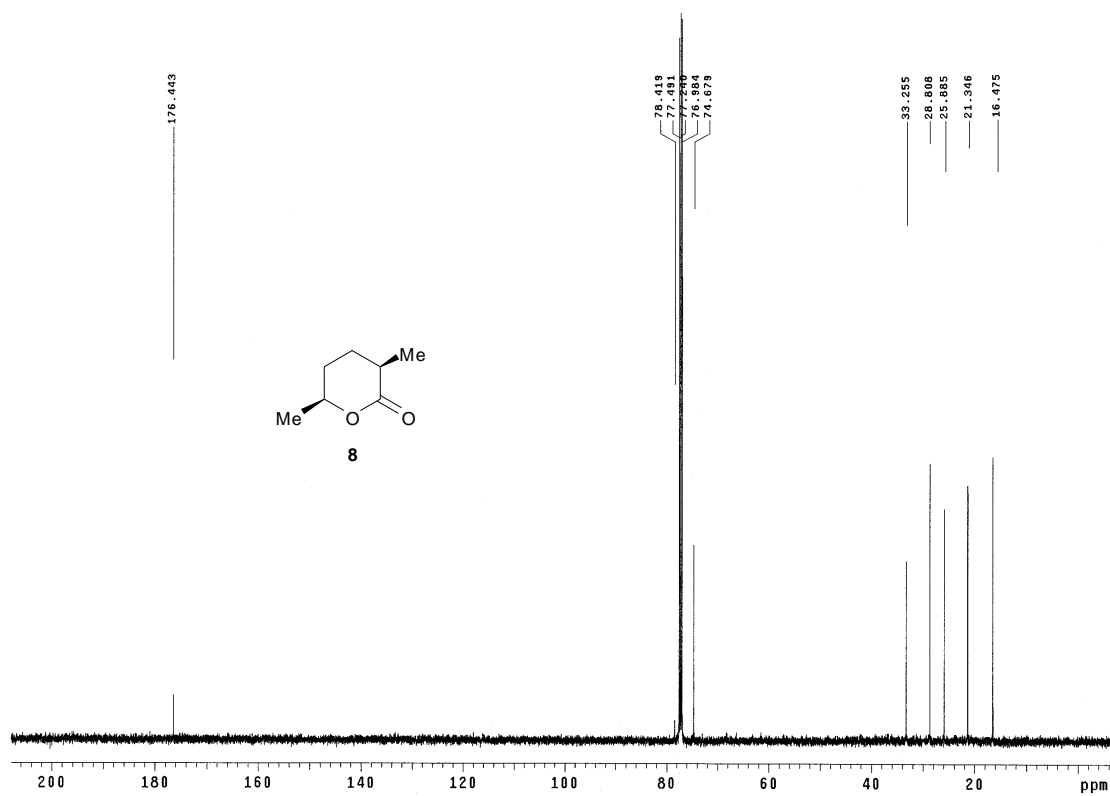

Supplement: c0cc05751g.pdf [file c0cc05751g.pdf]
